# Benefits and Risks of Dexamethasone in Noncardiac Surgery

Paul S. Myles, M.B.B.S., M.P.H., M.D., D.Sc., F.C.A.I., F.A.N.Z.C.A., F.R.C.A., F.A.H.M.S.,  
Tomas Corcoran, M.B.B.Ch., B.A.O., M.R.C.P.I., F.C.A.I., M.D., F.C.I.C.M.

Dexamethasone is a commonly used drug in anesthesia and surgery. The purported beneficial effects are diverse, especially for the prophylaxis and treatment of postoperative nausea and vomiting, but the optimal dose and the clinical implications of potential side effects require an updated summary of all available evidence.

This article reviews major trials and other studies of perioperative dexamethasone in adult noncardiac surgery, focusing on patient selection, optimal dose, and safety. We briefly consider its mode(s) of action and central role in the management of postoperative nausea and vomiting before providing updates on the benefits of dexamethasone for postoperative pain, quality of recovery, fatigue, sleep disturbance and mood, major complications and death, surgical site infection, hyperglycemia and diabetes control, and perioperative neurocognitive disorders, and conclude with a consideration of the optimal dexamethasone dose. We will not consider its use in pediatrics, cardiac surgery, or as a perineural adjuvant in peripheral nerve blocks.

In 2020, Weibel *et al.* published their results of an extensive systematic review and network meta-analysis comparing the clinical effect and safety of antiemetic drugs in adults undergoing any type of surgery under general anesthesia.<sup>1</sup> The authors concluded that effectiveness for postoperative nausea and vomiting has been convincingly demonstrated *but* that additional studies were needed to properly investigate the potential adverse effects of dexamethasone, including in patients with diabetes.<sup>1</sup> Such information has now become available.

## Mode(s) of Action

The mechanism of action of dexamethasone for postoperative nausea and vomiting is poorly understood, but it is likely to result from both nongenomic and genomic anti-inflammatory actions.<sup>2–6</sup> Surgery typically includes tissue injury and induces an inflammatory response,<sup>7,8</sup> both of which result in postoperative pain. Corticosteroids have potent anti-inflammatory actions that likely mitigate these effects,<sup>2</sup> presumably *via* their inhibition of both the cyclooxygenase and the lipoxygenase pathways,<sup>3,9</sup> stabilization of

neuronal membranes<sup>10</sup> and spinal cord nociceptive processing,<sup>11</sup> and reduction of bradykinin concentration in tissue.<sup>12</sup> Dexamethasone has also been shown to suppress the release of neuropeptides such as calcitonin gene-related peptide and substance P from nerve endings after tissue injury.<sup>13</sup>

The effects of IV dexamethasone take approximately 1 to 2 h to manifest because it needs to cross cell membranes in order to alter gene transcription.<sup>3</sup> Thus, it should be administered postinduction but before the start of surgery.<sup>14</sup> Because dexamethasone has a rather long biologic half-life of 36 to 72 h, a single dose can suppress cortisol concentration for up to 1 week.<sup>4</sup> Glucocorticoids such as dexamethasone can prevent the primary neurohumoral stress defenses from overshooting into dysregulated states that might otherwise impair recovery.<sup>3</sup>

## Postoperative Nausea and Vomiting

Postoperative nausea and vomiting is common, troublesome, costly,<sup>14</sup> and is often of greater concern to patients than postoperative pain.<sup>15</sup> It impairs quality of recovery,<sup>16,17</sup> particularly if severe or persistent,<sup>18</sup> and adversely affects patient satisfaction.<sup>19,20</sup> It is more common in nonsmokers,<sup>14</sup> females,<sup>14,21</sup> younger age groups<sup>14,21</sup>; those with a history of motion sickness or previous postoperative nausea and vomiting<sup>14</sup>; patients undergoing abdominal, laparoscopic, or thyroid surgery<sup>14,17,21–23</sup>; and patients with predicted high opioid requirements,<sup>14</sup> as well as after nitrous oxide administration<sup>14,21,24</sup> or longer durations of inhalational anesthesia.<sup>17,21</sup>

The 2013 American Society of Anesthesiologists Practice Guidelines for postanesthetic care stated that dexamethasone “is effective in the prophylaxis of postoperative vomiting and reduced use of rescue antiemetics, for the prophylaxis of nausea when higher doses are administered, and for the treatment of postoperative vomiting (Category A1–B evidence).”<sup>25</sup> The largest randomized trial conducted up until that time was the International Multicenter Protocol to Assess the Single and Combined Benefits of Antiemetic Interventions in a Controlled Clinical Trial, which enrolled 5,199 surgical patients and compared 4 mg

This article is featured in “This Month in Anesthesiology,” page A1.

Submitted for publication May 6, 2021. Accepted for publication June 28, 2021. Published online first on August 9, 2021. From the Department of Anaesthesiology and Perioperative Medicine, Alfred Hospital and Monash University, Melbourne, Australia (P.S.M.); and the Department of Anaesthesia and Pain Medicine, Royal Perth Hospital, Perth, Australia (T.C.).

Copyright © 2021, the American Society of Anesthesiologists. All Rights Reserved. Anesthesiology 2021; 135:895–903. DOI: 10.1097/ALN.0000000000003898

IV ondansetron, 4 mg dexamethasone, 1.25 mg droperidol, and three anesthetic drug options, in multiple combinations that allowed estimation of individual and combined clinical effects.<sup>26</sup> Dexamethasone reduced the risk of postoperative nausea and vomiting by 26% (relative risk [RR], 0.74 [95% CI, 0.70 to 0.82];  $P < 0.001$ ), comparable to both ondansetron and droperidol. Any combination of two of these drugs reduced the risk of postoperative nausea and vomiting by 45%. Dexamethasone is thus a first-line option for both the prevention and treatment of postoperative nausea and vomiting.<sup>14</sup> It can be used alone or in combination with one or two other classes of antiemetic drugs.<sup>14,26</sup>

The DREAMS (Dexamethasone Reduces Emesis after Major Gastrointestinal Surgery) trial, published in 2017,<sup>22</sup> was a large, pragmatic, multicenter randomized trial conducted across 45 hospitals in the United Kingdom. The enrollment was 1,350 adult patients undergoing elective open or laparoscopic bowel surgery. Participants were randomly assigned to a single dose of 8 mg IV dexamethasone at induction of anesthesia compared with standard care. All patients underwent general anesthesia and otherwise could receive antiemetic prophylaxis (other than dexamethasone) intraoperatively according to the attending anesthesiologist's usual practice. The primary endpoint of early (0 to 24 h) postoperative vomiting occurred in 172 (26%) participants in the dexamethasone group and 223 (33%) in the control group (RR, 0.77 [95% CI, 0.65 to 0.92];  $P = 0.003$ ). This protective effect was seen across different patient characteristics and analgesic techniques. Patients in the dexamethasone group also required fewer postoperative antiemetics for up to 72 h.<sup>22</sup> Early feeding occurred more often in the dexamethasone group, and there was no evidence of increased risk of superficial surgical site infection or other complications.

The Cochrane systematic review and network meta-analysis by Weibel *et al.* had a special emphasis on the safety of antiemetic drugs.<sup>1</sup> Adverse effects of interest included wound infection, extrapyramidal symptoms, sedation, constipation, headache, QT interval prolongation, and arrhythmias. The network meta-analyses design allowed both direct and indirect comparisons of different drugs across the variety of trial combinations, resulting in multiple one-on-one comparisons while also evaluating multiple treatments. This is a more efficient approach to synthesizing and summarizing all available evidence in a single program of work.<sup>1</sup> They included 585 randomized trials enrolling 97,516 patients, evaluating 44 single drugs and 51 drug combinations, of which dexamethasone was directly compared against comparators in up to 120 of those trials.<sup>1</sup> Intraoperative dexamethasone halved the risk of postoperative vomiting (RR, 0.51 [95% CI, 0.44 to 0.57]). Overall, dexamethasone was found to be highly effective and probably safe, although the authors noted their conclusions about safety were "low certainty" because of insufficient trial data.

The most up-to-date and comprehensive evidence supporting the antiemetic effectiveness and safety of dexamethasone comes from the PADDI (Perioperative Administration of Dexamethasone and Infection) trial, a large, pragmatic, randomized trial enrolling 8,725 patients undergoing noncardiac surgeries with durations of at least 2 h.<sup>27</sup> A single dose of 8 mg IV dexamethasone resulted in a highly significant reduction in the incidence of postoperative nausea and vomiting, even when there was no restriction on the use of other antiemetic therapies (fig. 1). The incidence of any postoperative nausea and vomiting up to 24 h after surgery was 42% in the dexamethasone group and 54% in the placebo group (RR, 0.78 [95% CI, 0.75 to 0.82];  $P < 0.001$ ). The need for postoperative antiemetic therapy was 38% in the dexamethasone group and 48% in the placebo group ( $P < 0.001$ ).

## Postoperative Pain

Given that corticosteroids have potent effects on local inflammatory mediators and pain pathways,<sup>2,3,9–12</sup> it is no surprise that dexamethasone has analgesic properties. Most research into the analgesic benefits of corticosteroids has occurred in dental and maxillofacial surgery. A meta-analysis conducted in 2010 showed a significant decrease in edema and postprocedure pain (both  $P < 0.001$ ) in this setting.<sup>28</sup>

In 2013, a systematic review and meta-analysis of 45 randomized trials that enrolled 5,796 patients was published, evaluating dexamethasone and reported pain outcomes in adults undergoing surgery.<sup>29</sup> Patients undergoing dental and maxillofacial surgery were excluded because of the previous publication.<sup>28</sup> Doses of dexamethasone ranged from 1.25 to 20 mg.<sup>29</sup> Patients receiving dexamethasone had lower pain scores at 2 and 24 h after surgery, but the mean difference in pain scores was approximately 0.5 on a 0-to-10 visual analog scale. Dexamethasone also reduced opioid consumption at both time points, but the small effect size of these benefits suggest minimal clinical value. Importantly, however, dexamethasone-treated patients required less rescue analgesia for intolerable pain (RR, 0.80 [95% CI, 0.69 to 0.93];  $P = 0.004$ ).<sup>29</sup> The authors could not identify a dose-response with regard to the opioid-sparing effect, but few trials have been done to assess this aspect of corticosteroid pharmacology.

The most recent meta-analysis of trials evaluating numerous adjuvant analgesics, including dexamethasone, was published in 2018.<sup>30</sup> This study included a meta-regression analysis for the outcome of 24-h morphine consumption as a measure of the intensity of analgesic requirements as a baseline covariate to allow the construction of a league table of adjuvant analgesics adjusted for the intensity of surgery. The study included 344 randomized trials enrolling 28,130 patients. The actual type of surgery was not independently associated with analgesic benefit. Many adjuvants had moderate analgesic effects (opioid-sparing effect greater than 10 mg morphine equivalents): gabapentin,

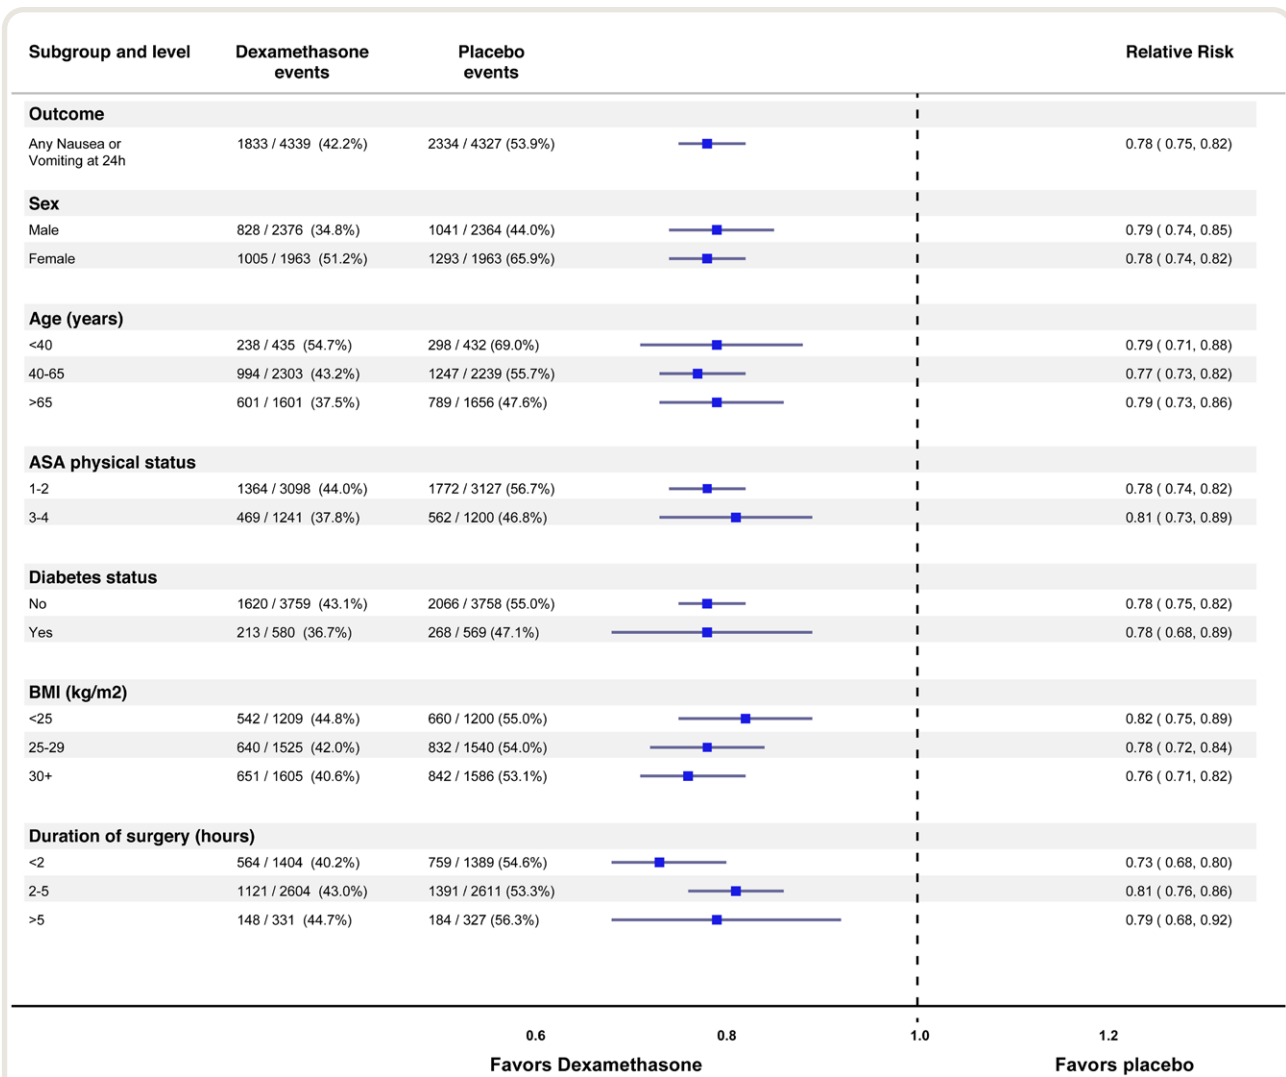

**Fig. 1.** The effect of 8 mg dexamethasone on the incidence of nausea and vomiting up to 24 h after surgery across subgroups. ASA, American Society of Anesthesiologists; BMI, body mass index.

acetaminophen,  $\alpha_2$ -agonists, nonsteroidal anti-inflammatory drugs and cyclooxygenase-2 inhibitors, pregabalin, tramadol, magnesium, and lidocaine. However, dexamethasone had a smaller benefit (approximately 5 mg morphine equivalents).<sup>30</sup> A more recent systematic review found no clinically significant analgesic benefits for gabapentinoids, but did identify a greater risk of adverse events.<sup>31</sup> Dexamethasone has been found to have stronger analgesic benefit in both spine and ear, nose, and throat surgeries.<sup>30</sup> Comparably stronger analgesic benefit has also been identified in a meta-analysis of dexamethasone and other corticosteroids in patients undergoing joint arthroplasty,<sup>32</sup> knee arthroscopy,<sup>33</sup> and tonsillectomy.<sup>34</sup> It seems, therefore, that dexamethasone has useful analgesic properties in some types of surgery, and may also be helpful for patients at risk of opioid-related side effects.

### Quality of Recovery, Fatigue, Sleep Disturbance, and Mood

The proinflammatory and catabolic state that occurs after surgery can impair recovery. Wound pain or other discomfort, fatigue, sleep disturbance, and cognitive dysfunction are common.<sup>16</sup> Several validated quality of recovery (QoR) scales have been developed to quantify these and other attributes, along with global scores of recovery.<sup>16,35,36</sup> Some of these QoR scales have been used to evaluate postoperative outcome benefits of dexamethasone.

A small randomized trial published in 2003 found that dexamethasone had likely benefits in patients undergoing laparoscopic cholecystectomy.<sup>37</sup> A dose of 8 mg IV dexamethasone significantly reduced postoperative concentrations of C-reactive protein (an inflammatory marker;

$P = 0.01$ ), fatigue ( $P = 0.01$ ), overall pain ( $P < 0.05$ ), postoperative nausea and vomiting ( $P < 0.05$ ), and opioid requirements ( $P < 0.05$ ) after surgery.<sup>37</sup> Resumption of recreational activities was significantly faster in the dexamethasone group *versus* placebo group (median, 1 day *vs.* 2 days;  $P < 0.05$ ).<sup>37</sup> The reduction in fatigue and improvement in physical functioning are of particular interest, supporting additional benefits of corticosteroids beyond reductions in postoperative nausea and vomiting and pain.

A double-blind, randomized trial enrolling 106 female patients undergoing outpatient gynecological laparoscopy compared IV saline (control group), 0.05 mg/kg dexamethasone, or 0.1 mg/kg dexamethasone administered immediately before induction of anesthesia.<sup>38</sup> The primary outcome was the global QoR-40 score at 24 h after surgery. Dexamethasone resulted in much improved QoR, with the global median (interquartile range) QoR-40 after 0.1 mg/kg dexamethasone (193 [192 to 195]) being greater than 0.05 mg/kg dexamethasone (179 [175 to 185];  $P = 0.004$ ) or saline (171 [160 to 182];  $P < 0.005$ ). The improvement in QoR-40 score seen with the higher dose (0.1 mg/kg) is clinically important.<sup>39</sup> Dexamethasone also provided a clinically important opioid-sparing effect, with the median morphine equivalents administered before discharge being 2.7 mg (0 to 6.3) after 0.1 mg/kg dexamethasone, 5.3 mg (2.4 to 8.8) after 0.05 mg/kg dexamethasone, and 5.3 mg (2.7 to 7.8) after saline ( $P = 0.02$ ). Hospital discharge time was 30 min shorter after 0.1 mg/kg dexamethasone compared with saline ( $P = 0.005$ ). At 24 h, subjects receiving 0.1 mg/kg dexamethasone had consumed less opioid analgesics, and reported less sore throat, muscle pain, confusion, difficulty in falling asleep, and nausea compared with 0.05 mg/kg dexamethasone or saline.<sup>38</sup> Similar findings have been reported by others,<sup>40,41</sup> and in patients undergoing cardiac surgery.<sup>42</sup>

Mihara *et al.* published a sequential analysis of randomized trials in 2016, reporting the clinical benefit of corticosteroids in patients undergoing general anesthesia and surgery assessed using the QoR-40 scale.<sup>41</sup> They identified three randomized trials that enrolled 301 patients and found that dexamethasone significantly improved QoR-40 scores at postoperative day 1 when compared with placebo, with a mean difference of 14.2 points (95% CI, 10.4 to 18.1;  $P < 0.001$ ). Once again, this effect size indicates a clinically important benefit.<sup>39</sup> The positive effects of dexamethasone were most apparent in the dimensions of physical comfort, emotional state, and pain relief.

The PADDI trial also collected QoR data at 24 h and 30 days after surgery.<sup>43</sup> A single dose of 8 mg IV dexamethasone resulted in a moderate improvement in the QoR-15 score at 24 h (median difference, 5.0 [95% CI, 3.8 to 6.2];  $P < 0.001$ ) when compared with placebo.

These studies offer useful guidance on the optimal dose of dexamethasone in surgery. Although both 4 mg and 8 mg have consistently been shown to provide effective

prophylaxis (and treatment) for postoperative nausea and vomiting, the higher dose (8 mg) almost certainly provides additional benefits for both analgesia and QoR, and perhaps earlier hospital discharge.

## Major Complications and Death

An excessive (dysregulated) inflammatory response to surgery can lead to organ injury, serious complications, and death. The PACMAN (Perioperative Administration of Corticotherapy on Morbidity and Mortality after Noncardiac Surgery) trial was a pragmatic, double-blind, randomized trial that enrolled 1,222 patients undergoing major noncardiac surgery and compared IV saline (control group) with 0.2 mg/kg IV dexamethasone administered immediately after surgery, with a second 0.2 mg/kg dose administered on the day after surgery.<sup>44</sup> The primary outcome was a composite of postoperative complications or all-cause mortality up to 14 days after surgery. Although the dexamethasone group had less serious complications or death (17.0% *vs.* 19.9%), which was not statistically significant (odds ratio [OR], 0.81 [95% CI, 0.60 to 1.08];  $P = 0.15$ ), dexamethasone did result in a reduced risk of complications or death in patients undergoing nonthoracic surgery (OR, 0.70 [95% CI, 0.50 to 0.99]). Additional analyses identified potential reductions in acute kidney injury and respiratory failure; there was no evidence of increased risk of surgical site or other infections, or impaired wound healing.<sup>44</sup>

## Surgical Site Infection

Chronic steroid therapy has been associated with an increased risk of wound infection, anastomotic leak, and poor wound healing, but not with single-dose or short-term treatment.<sup>22</sup> A meta-analysis evaluating a range of corticosteroids in oral surgery did not find any evidence of increased risk of infection in that setting.<sup>28</sup> A 2019 Cochrane systematic review and meta-analysis of 37 trials that enrolled 4,603 patients found no evidence that dexamethasone increased the risk of a postoperative wound infection (OR, 1.01 [95% CI, 0.80 to 1.27]) or wound healing (OR, 0.99 [95% CI, 0.28 to 3.43]).<sup>45</sup> A previous but more extensive systematic review reported equally reassuring findings.<sup>46</sup> Of interest, the DREAMS trial found that the incidence of anastomotic leak within 30 days of surgery was lower in the dexamethasone group (11 patients [1.6%]) when compared with the control group (21 patients [3.1%]) (RR, 0.53 [95% CI, 0.26 to 1.08];  $P = 0.08$ ).<sup>22</sup>

The most compelling data, however, come from the recently published PADDI trial.<sup>43</sup> Because of the ongoing concern that dexamethasone may increase the risk of surgical site infection, Corcoran *et al.* conducted a large, pragmatic, international, noninferiority trial that enrolled 8,725 patients undergoing noncardiac surgery of at least 2 h duration. The trial population included 1,149 (13%) patients with known diabetes. Patients were randomly assigned to



receive 8 mg IV dexamethasone or matched placebo after induction of general anesthesia, but before surgical incision. The primary outcome was surgical site infection within 30 days of surgery, and anastomotic leak and other sepsis outcomes were secondary endpoints. The prespecified noninferiority margin was 2.0%; this means that receiving dexamethasone would be considered “just as safe” as not receiving dexamethasone if the incidence of surgical site infections were not more than 2% higher in the dexamethasone group than that seen in the placebo group. The results were completely reassuring. Surgical site infection occurred in 8.1% of patients in the dexamethasone group and 9.1% of patients in the placebo group. The statistical test for noninferiority resulted in a *P* value less than 0.001, clearly demonstrating that dexamethasone did not meaningfully increasing the risk of surgical site infection. Results were consistent across prespecified subgroups, including in patients with diabetes (fig. 2).

### Hyperglycemia and Diabetes Control

Dexamethasone is a glucocorticosteroid, so it is no surprise that it can increase blood glucose in surgical patients with impaired blood glucose tolerance or diabetes.<sup>47,48</sup> The 2014 consensus guidelines for management of postoperative nausea and vomiting state that dexamethasone is relatively contraindicated in labile diabetic patients<sup>14</sup>; however, more recent data provide reassurance.

The 2019 Cochrane review included eight trials enrolling 595 patients and found that dexamethasone led to a small increase in blood glucose within the first 12 h after surgery in patients *without* diabetes (mean difference, 0.7 mmol/l [95% CI, 0.3 to 1.2]).<sup>45</sup> This small increase in blood glucose is unlikely to be clinically important, but can be expected to increase the need for insulin therapy.<sup>44</sup> A randomized trial enrolling both nondiabetic patients and patients with type 2 diabetes randomly assigned to receive 8 mg IV dexamethasone or 4 mg ondansetron found that in diabetic patients, the mean maximum blood glucose was higher in the dexamethasone group when compared with ondansetron ( $14.0 \pm 2.5$  mM *vs.*  $10.7 \pm 2.4$  mM; *P* < 0.01).<sup>49</sup>

A moderate degree of postoperative hyperglycemia may therefore occur with dexamethasone in patients with diabetes, and this may be influenced by the patient's preoperative glycemic control.<sup>50</sup> How often this occurs, how much more likely treatment with insulin is required, and whether it leads to adverse clinical outcomes has, until now, been largely unresolved. The PADDI trial collected detailed data concerning blood glucose and diabetes control.<sup>43</sup> Of the 1,149 (13%) patients with known diabetes, nearly all had type 2 diabetes and only 2.3% had insulin-dependent type 1 diabetes. Overall, the median difference in peak blood glucose in the first 48 h after surgery between the dexamethasone and placebo groups was 1.3 mmol/l (95% CI, 1.2 to 1.3). Insulin therapy was required in a small proportion of nondiabetic patients and was more common in the

dexamethasone group (0.5% *vs.* 0.1%; RR, 4.74 [95% CI, 1.57 to 19.2]). Patients with diabetes were not at increased risk of surgical site infection if they received dexamethasone (fig. 2).

### Perioperative Neurocognitive Disorders

Perioperative neurocognitive disorders encapsulate the cognitive impairment identified in the pre- or postoperative period,<sup>51</sup> including postoperative cognitive dysfunction and postoperative delirium. Although the underlying mechanisms are likely to be multifactorial, with both surgical and anesthetic triggers, systemic and neuroinflammation are likely to play a substantive role.<sup>52</sup> Thus, corticosteroids, at least theoretically, could mitigate the risk of perioperative neurocognitive disorders.

A meta-analysis of five randomized trials evaluating the effects of dexamethasone on postoperative cognitive dysfunction (three trials) and postoperative delirium (two trials) in adults found no significant difference between the dexamethasone group and the placebo group for both postoperative cognitive dysfunction (RR, 1.00 [95% CI, 0.51 to 1.96]; *P* = 1.00), and postoperative delirium (RR, 0.96 [95% CI, 0.68 to 1.35]; *P* = 0.80).<sup>53</sup> However, the quality of the evidence was considered low and the findings remain unreliable. Several clinical trials are currently underway that might resolve this uncertainty (*e.g.*, NCT02109081 and ACTRN12617001540303).

### Optimal Dexamethasone Dose

Most studies evaluating dexamethasone in perioperative practice have used varied doses, often 4 or 5 mg, or 8 or 10 mg, largely because of ampoule or vial size/preparation available in the study setting(s). Unfortunately, there are very few head-to-head dose comparisons. The most recent systematic review examined perioperative dexamethasone use in 120 randomized trials, mainly administered intravenously at doses of 1.25 to 35 mg.<sup>1</sup> This review identified that moderate doses, most often 8 mg, seemed to be the optimal dose in perioperative practice. A dose of 8 to 10 mg dexamethasone had a significantly greater effect for reducing the incidence of postoperative nausea and vomiting than 1.25 to 5 mg dexamethasone. A meta-analysis of patients undergoing thyroidectomy found that dexamethasone at 8 to 10 mg had the greatest effect in reducing postoperative nausea and vomiting.<sup>23</sup> In the DREAMS trial, patients receiving the prophylactic single dose of 8 mg IV dexamethasone before surgery required fewer postoperative antiemetics for up to 72 h after surgery.<sup>22</sup> The PACMAN trial evaluated two doses (after surgery and on day 1) of 0.2 mg/kg IV dexamethasone, aiming for a reduction in serious complications or death.<sup>44</sup>

The optimal dose to achieve its maximal analgesic benefit is unclear. A recent randomized trial comparing two doses of IV dexamethasone (8 mg *vs.* 24 mg) in patients

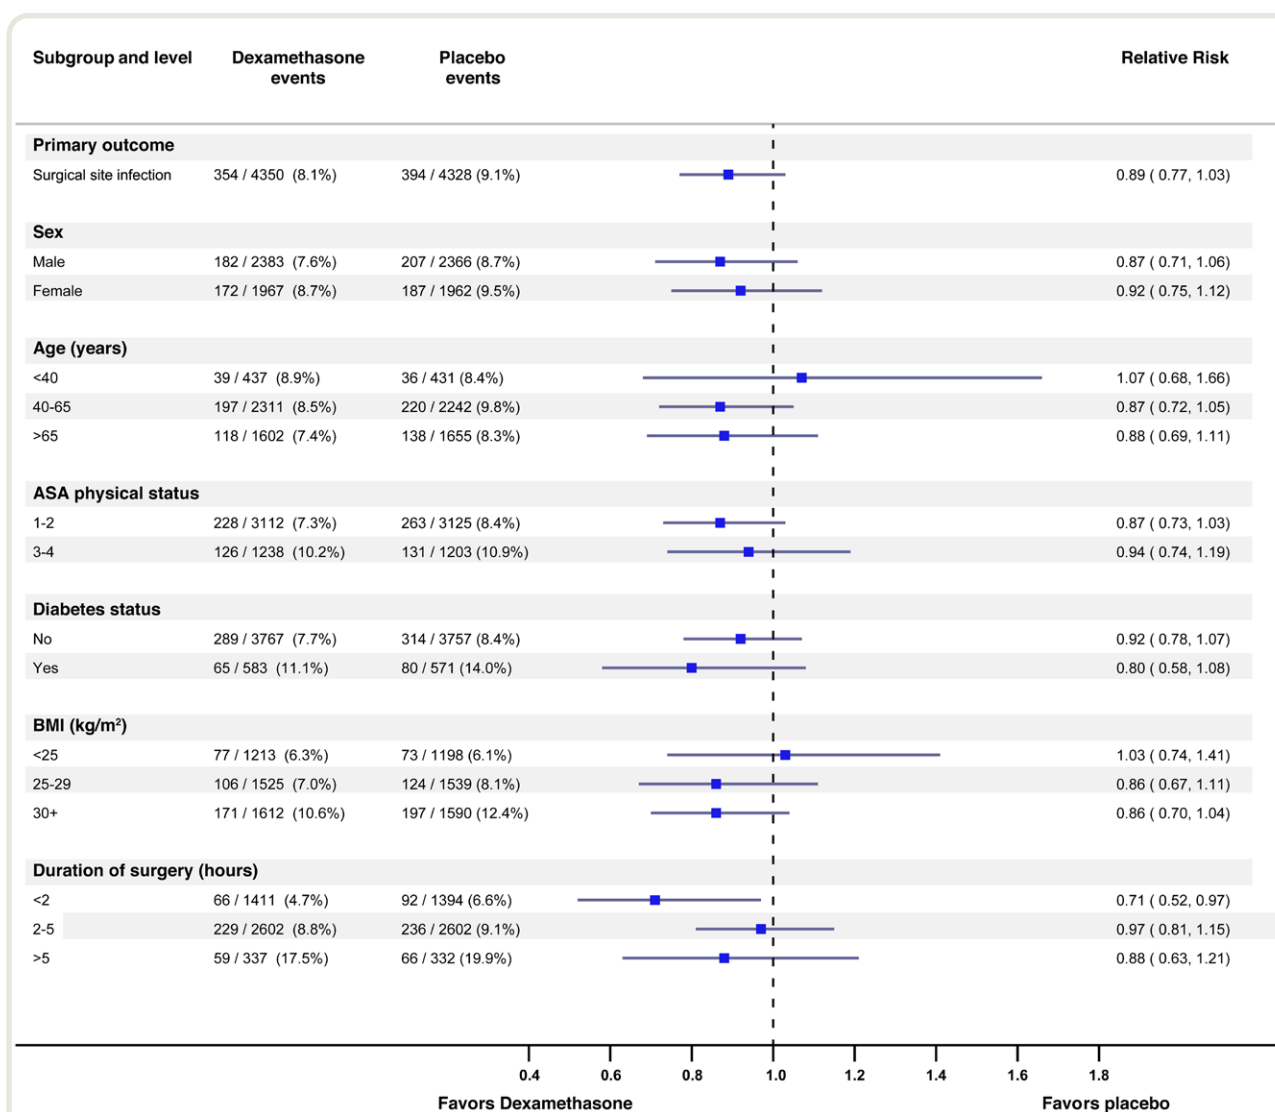

**Fig. 2.** The effect of 8 mg dexamethasone on the incidence of surgical site infection up to 30 days after surgery across subgroups. ASA, American Society of Anesthesiologists; BMI, body mass index.

undergoing mastectomy could not identify any measurable difference in pain scores, although the authors pointed out that most of their trial patients had modest pain and analgesic requirements.<sup>54</sup>

While 4 mg dexamethasone is effective in preventing and treating postoperative nausea and vomiting, slightly higher doses (8 to 10 mg) are needed to provide a better QoR, and possibly improved analgesia and less fatigue.<sup>1,38</sup> There is very little evidence that higher intraoperative doses (more than 10 mg) offer any additional benefit.

## Conclusions

We recommend dexamethasone (4 to 8 mg) for the prophylaxis and treatment of postoperative nausea and

vomiting; the higher dose provides an antiemetic benefit for up to 72 h.<sup>22</sup> A dose of 8 mg IV dexamethasone provides some analgesic benefit, particularly in orthopedic, oral, and ear, nose, and throat surgeries, and otherwise improves patient QoR after surgery. While dexamethasone increases blood glucose, particularly in patients with diabetes, the clinical significance of this is likely to be very small. The recent PADDI trial did not identify any increase in risk of surgical site infection when using dexamethasone (8 mg).<sup>43</sup> In fact, dexamethasone had little or no effect on any adverse events after surgery (RR, 0.77 [95% CI, 0.55 to 1.08]).<sup>1</sup> Dexamethasone is a cheap, safe, and effective drug in perioperative practice; more frequent use should be promoted.

## Research Support

Dr. Myles is supported by an Australian National Health and Medical Research Council (Canberra, Australia) Practitioner Fellowship. Dr. Corcoran is supported by a Health Department of Western Australia (Perth, Australia) Raine Foundation Clinical Practitioner Fellowship.

## Competing Interests

The authors declare no competing interests.

## Correspondence

Address correspondence to Dr. Myles: Department of Anaesthesiology and Perioperative Medicine, Alfred Hospital, Commercial Road, Melbourne, VIC 3004, Australia. [p.myles@alfred.org.au](mailto:p.myles@alfred.org.au). ANESTHESIOLOGY's articles are made freely accessible to all readers, for personal use only, 6 months from the cover date of the issue.

## References

1. Weibel S, Rücker G, Eberhart LH, Pace NL, Hartl HM, Jordan OL, Mayer D, Riemer M, Schaefer MS, Raj D, Backhaus I, Helf A, Schlesinger T, Kienbaum P, Kranke P: Drugs for preventing postoperative nausea and vomiting in adults after general anaesthesia: A network meta-analysis. *Cochrane Database Syst Rev* 2020; 10:CD012859
2. Holte K, Kehlet H: Perioperative single-dose glucocorticoid administration: Pathophysiologic effects and clinical implications. *J Am Coll Surg* 2002; 195:694–712
3. Sapolsky RM, Romero LM, Munck AU: How do glucocorticoids influence stress responses? Integrating permissive, suppressive, stimulatory, and preparative actions. *Endocr Rev* 2000; 21:55–89
4. Fauci AS, Dale DC, Balow JE: Glucocorticosteroid therapy: Mechanisms of action and clinical considerations. *Ann Intern Med* 1976; 84:304–15
5. Stahn C, Buttgerit F: Genomic and nongenomic effects of glucocorticoids. *Nat Clin Pract Rheumatol* 2008; 4:525–33
6. Bain CR, Draxler DF, Taylor R, Wallace S, Gouldthorpe O, Corcoran TB, Myles PS, L Medcalf R, Bozaoglu K: The early in-vivo effects of a single anti-emetic dose of dexamethasone on innate immune cell gene expression and activation in healthy volunteers. *Anaesthesia* 2018; 73:955–66
7. Miyaoka K, Iwase M, Suzuki R, Kondo G, Watanabe H, Ito D, Nagumo M: Clinical evaluation of circulating interleukin-6 and interleukin-10 levels after surgery-induced inflammation. *J Surg Res* 2005; 125:144–50
8. Mokart D, Merlin M, Sannini A, Brun JP, Delperro JR, Houvenaeghel G, Moutardier V, Blache JL: Procalcitonin, interleukin 6 and systemic inflammatory response syndrome (SIRS): Early markers of postoperative sepsis after major surgery. *Br J Anaesth* 2005; 94:767–73
9. Rhen T, Cidlowski JA: Antiinflammatory action of glucocorticoids—New mechanisms for old drugs. *N Engl J Med* 2005; 353:1711–23
10. Devor M, Govrin-Lippmann R, Raber P: Corticosteroids suppress ectopic neural discharge originating in experimental neuromas. *Pain* 1985; 22:127–37
11. Svensson CI, Yaksh TL: The spinal phospholipase-cyclooxygenase-prostanoid cascade in nociceptive processing. *Annu Rev Pharmacol Toxicol* 2002; 42:553–83
12. Hargreaves KM, Costello A: Glucocorticoids suppress levels of immunoreactive bradykinin in inflamed tissue as evaluated by microdialysis probes. *Clin Pharmacol Ther* 1990; 48:168–78
13. Hong D, Byers MR, Oswald RJ: Dexamethasone treatment reduces sensory neuropeptides and nerve sprouting reactions in injured teeth. *Pain* 1993; 55:171–81
14. Gan TJ, Diemunsch P, Habib AS, Kovac A, Kranke P, Meyer TA, Watcha M, Chung F, Angus S, Apfel CC, Bergese SD, Candiotti KA, Chan MT, Davis PJ, Hooper VD, Lagoo-Deenadayalan S, Myles P, Nezat G, Philip BK, Tramèr MR; Society for Ambulatory Anesthesia: Consensus guidelines for the management of postoperative nausea and vomiting. *Anesth Analg* 2014; 118:85–113
15. Macario A, Weinger M, Truong P, Lee M: Which clinical anesthesia outcomes are both common and important to avoid? The perspective of a panel of expert anesthesiologists. *Anesth Analg* 1999; 88:1085–91
16. Myles PS, Hunt JO, Nightingale CE, Fletcher H, Beh T, Tanil D, Nagy A, Rubinstein A, Ponsford JL: Development and psychometric testing of a quality of recovery score after general anesthesia and surgery in adults. *Anesth Analg* 1999; 88:83–90
17. Myles PS, Chan MT, Kasza J, Paech MJ, Leslie K, Peyton PJ, Sessler DI, Haller G, Beattie WS, Osborne C, Sneyd JR, Forbes A: Severe nausea and vomiting in the Evaluation of Nitrous Oxide in the Gas Mixture for Anesthesia II trial. *ANESTHESIOLOGY* 2016; 124:1032–40
18. Myles PS, Wengritzky R: Simplified postoperative nausea and vomiting impact scale for audit and post-discharge review. *Br J Anaesth* 2012; 108:423–9
19. Myles PS, Williams DL, Hendrata M, Anderson H, Weeks AM: Patient satisfaction after anaesthesia and surgery: Results of a prospective survey of 10,811 patients. *Br J Anaesth* 2000; 84:6–10
20. Macario A, Weinger M, Carney S, Kim A: Which clinical anesthesia outcomes are important to avoid? The perspective of patients. *Anesth Analg* 1999; 89:652–8
21. Leslie K, Myles PS, Chan MT, Paech MJ, Peyton P, Forbes A, McKenzie D; ENIGMA Trial Group: Risk factors for severe postoperative nausea and vomiting

- in a randomized trial of nitrous oxide-based vs nitrous oxide-free anaesthesia. *Br J Anaesth* 2008; 101:498–505
22. DREAMS Trial Collaborators and West Midlands Research Collaborative: Dexamethasone versus standard treatment for postoperative nausea and vomiting in gastrointestinal surgery: Randomised controlled trial (DREAMS Trial). *BMJ* 2017; 357:j1455
  23. Zou Z, Jiang Y, Xiao M, Zhou R: The impact of prophylactic dexamethasone on nausea and vomiting after thyroidectomy: A systematic review and meta-analysis. *PLoS One* 2014; 9:e109582
  24. Myles PS, Leslie K, Chan MT, Forbes A, Peyton PJ, Paech MJ, Beattie WS, Sessler DI, Devereaux PJ, Silbert B, Schricker T, Wallace S; ANZCA Trials Group for the ENIGMA-II investigators: The safety of addition of nitrous oxide to general anaesthesia in at-risk patients having major non-cardiac surgery (ENIGMA-II): A randomised, single-blind trial. *Lancet* 2014; 384:1446–54
  25. Apfelbaum JL, Silverstein JH, Chung FF, Connis RT, Fillmore RB, Hunt SE, Nickinovich DG, Schreiner MS, Silverstein JH, Apfelbaum JL, Barlow JC, Chung FF, Connis RT, Fillmore RB, Hunt SE, Joas TA, Nickinovich DG, Schreiner MS; American Society of Anesthesiologists Task Force on Postanesthetic Care: Practice guidelines for postanesthetic care: An updated report by the American Society of Anesthesiologists Task Force on Postanesthetic Care. *ANESTHESIOLOGY* 2013; 118:291–307
  26. Apfel CC, Korttila K, Abdalla M, Kerger H, Turan A, Vedder I, Zernak C, Danner K, Jokela R, Pocock SJ, Trenkler S, Kredel M, Biedler A, Sessler DI, Roewer N; IMPACT Investigators: A factorial trial of six interventions for the prevention of postoperative nausea and vomiting. *N Engl J Med* 2004; 350:2441–51
  27. Corcoran TB, Myles PS, Forbes AB, Cheng AC, Bach LA, O'Loughlin E, Leslie K, Chan MTV, Story D, Short TG, Martin C, Coutts P, Ho KM; PADDI Investigators; Australian and New Zealand College of Anaesthetists Clinical Trials Network; Australasian Society for Infectious Diseases Clinical Research Network: Dexamethasone and surgical-site infection. *N Engl J Med* 2021; 384:1731–41
  28. Dan AE, Thygesen TH, Pinholt EM: Corticosteroid administration in oral and orthognathic surgery: A systematic review of the literature and meta-analysis. *J Oral Maxillofac Surg* 2010; 68:2207–20
  29. Waldron NH, Jones CA, Gan TJ, Allen TK, Habib AS: Impact of perioperative dexamethasone on postoperative analgesia and side-effects: Systematic review and meta-analysis. *Br J Anaesth* 2013; 110:191–200
  30. Doleman B, Sutton AJ, Sherwin M, Lund JN, Williams JP: Baseline morphine consumption may explain between-study heterogeneity in meta-analyses of adjuvant analgesics and improve precision and accuracy of effect estimates. *Anesth Analg* 2018; 126:648–60
  31. Verret M, Lauzier F, Zarychanski R, Perron C, Savard X, Pinard AM, Leblanc G, Cossi MJ, Neveu X, Turgeon AF; Canadian Perioperative Anesthesia Clinical Trials (PACT) Group: Perioperative use of gabapentinoids for the management of postoperative acute pain: A systematic review and meta-analysis. *ANESTHESIOLOGY* 2020; 133:265–79
  32. Lex JR, Edwards TC, Packer TW, Jones GG, Ravi B: Perioperative systemic dexamethasone reduces length of stay in total joint arthroplasty: A systematic review and meta-analysis of randomized controlled trials. *J Arthroplasty* 2021; 36:1168–86
  33. Peng C, Li C, Yuan B, Jiao J: The efficacy of dexamethasone on pain management for knee arthroscopy: A meta-analysis of randomized controlled trials. *Medicine (Baltimore)* 2020; 99:e19417
  34. Tolska HK, Hamunen K, Takala A, Kontinen VK: Systematic review of analgesics and dexamethasone for post-tonsillectomy pain in adults. *Br J Anaesth* 2019; 123:e397–411
  35. Gornall BF, Myles PS, Smith CL, Burke JA, Leslie K, Pereira MJ, Bost JE, Kluivers KB, Nilsson UG, Tanaka Y, Forbes A: Measurement of quality of recovery using the QoR-40: A quantitative systematic review. *Br J Anaesth* 2013; 111:161–9
  36. Stark PA, Myles PS, Burke JA: Development and psychometric evaluation of a postoperative quality of recovery score: The QoR-15. *ANESTHESIOLOGY* 2013; 118:1332–40
  37. Bisgaard T, Klarskov B, Kehlet H, Rosenberg J: Preoperative dexamethasone improves surgical outcome after laparoscopic cholecystectomy: A randomized double-blind placebo-controlled trial. *Ann Surg* 2003; 238:651–60
  38. De Oliveira GS Jr, Ahmad S, Fitzgerald PC, Marcus RJ, Altman CS, Panjwani AS, McCarthy RJ: Dose ranging study on the effect of preoperative dexamethasone on postoperative quality of recovery and opioid consumption after ambulatory gynaecological surgery. *Br J Anaesth* 2011; 107:362–71
  39. Myles PS, Myles DB, Galagher W, Chew C, MacDonald N, Dennis A: Minimal clinically important difference for three quality of recovery scales. *ANESTHESIOLOGY* 2016; 125:39–45
  40. Surender, Arora P, Khurana G, Sachan PK: Comparison of postoperative quality of recovery and pain relief with preoperative single-dose dexamethasone and lignocaine after laparoscopic cholecystectomy. *Anesth Essays Res* 2018; 12:630–5
  41. Mihara T, Ishii T, Ka K, Goto T: Effects of steroids on quality of recovery and adverse events after general anesthesia: Meta-analysis and trial sequential analysis of randomized clinical trials. *PLoS One* 2016; 11:e0162961
  42. Murphy GS, Sherwani SS, Szokol JW, Avram MJ, Greenberg SB, Patel KM, Wade LD, Vaughn J, Gray J:



- Small-dose dexamethasone improves quality of recovery scores after elective cardiac surgery: A randomized, double-blind, placebo-controlled study. *J Cardiothorac Vasc Anesth* 2011; 25:950–60
43. Corcoran TB, Myles PS, Forbes AB, Cheng AC, Bach LA, O'Loughlin E, Leslie K, Chan MTV, Story D, Short TG, Martin C, Coutts P, Ho KM; PADDI Investigators; Australian and New Zealand College of Anaesthetists Clinical Trials Network; Australasian Society for Infectious Diseases Clinical Research Network: Dexamethasone and surgical-site infection. *N Engl J Med* 2021; 384:1731–41
  44. Asehnoune K, Le Moal C, Lebuffe G, Le Penndu M, Josse NC, Boisson M, Lescot T, Faucher M, Jaber S, Godet T, Leone M, Motamed C, David JS, Cinotti R, El Amine Y, Liutkus D, Garot M, Marc A, Le Corre A, Thomasseau A, Jobert A, Flet L, Feuillet F, Pere M, Futier E, Roquilly A; PACMAN study group: Effect of dexamethasone on complications or all cause mortality after major non-cardiac surgery: Multicentre, double blind, randomised controlled trial. *BMJ* 2021; 373:n1162
  45. Polderman JAW, Farhang-Razi V, van Dieren S, Kranke P, DeVries JH, Hollmann MW, Preckel B, Hermanides J: Adverse side-effects of dexamethasone in surgical patients – An abridged Cochrane systematic review. *Anaesthesia* 2019; 74:929–39
  46. Toner AJ, Ganeshanathan V, Chan MT, Ho KM, Corcoran TB: Safety of perioperative glucocorticoids in elective noncardiac surgery: A systematic review and meta-analysis. *ANESTHESIOLOGY* 2017; 126:234–48
  47. Nazar CE, Lacassie HJ, López RA, Muñoz HR: Dexamethasone for postoperative nausea and vomiting prophylaxis: Effect on glycaemia in obese patients with impaired glucose tolerance. *Eur J Anaesthesiol* 2009; 26:318–21
  48. Hans P, Vanthuyne A, Dewandre PY, Brichant JF, Bonhomme V: Blood glucose concentration profile after 10 mg dexamethasone in non-diabetic and type 2 diabetic patients undergoing abdominal surgery. *Br J Anaesth* 2006; 97:164–70
  49. Tien M, Gan TJ, Dhakal I, White WD, Olufolabi AJ, Fink R, Mishriky BM, Lacassie HJ, Habib AS: The effect of anti-emetic doses of dexamethasone on post-operative blood glucose levels in non-diabetic and diabetic patients: A prospective randomised controlled study. *Anaesthesia* 2016; 71:1037–43
  50. Corcoran TB, O'Loughlin E, Chan MTV, Ho KM: Perioperative administration of dexamethasone and blood glucose concentrations in patients undergoing elective non-cardiac surgery – The randomised controlled PADDAG trial. *Eur J Anaesthesiol* 2021; 38:932–42
  51. Evered L, Silbert B, Knopman DS, Scott DA, DeKosky ST, Rasmussen LS, Oh ES, Crosby G, Berger M, Eckenhoof RG; Nomenclature Consensus Working Group: Recommendations for the nomenclature of cognitive change associated with anaesthesia and surgery-2018. *ANESTHESIOLOGY* 2018; 129:872–9
  52. Liu X, Yu Y, Zhu S: Inflammatory markers in post-operative delirium (POD) and cognitive dysfunction (POCD): A meta-analysis of observational studies. *PLoS One* 2018; 13:e0195659
  53. Li LQ, Wang C, Fang MD, Xu HY, Lu HL, Zhang HZ: Effects of dexamethasone on post-operative cognitive dysfunction and delirium in adults following general anaesthesia: A meta-analysis of randomised controlled trials. *BMC Anesthesiol* 2019; 19:113
  54. Steinhorsdottir KJ, Awada HN, Abildstrøm H, Kroman N, Kehlet H, Aasvang EK: Dexamethasone dose and early postoperative recovery after mastectomy: A double-blind, randomized Trial. *ANESTHESIOLOGY* 2020; 132:678–91
